# Supplementary material
Source: Research Square preprint supplement (doi:10.21203/rs.3.rs-9003568/v1)
Supplement: Supplementary file 1 [file 77fd36f52e66db156f714457.docx]

**Decoding Pedestrian Severity at Crosswalks using Hybrid Clustering and Random Parameter Models**

**CRediT Authorship Contribution Statement**

Swastika Barua: Conceptualization, Methodology, Formal analysis, Writing – original draft, Writing – review & editing; Subasish Das: Data curation, Supervision, Writing – review & editing; Michael Starewich: Formal analysis, Visualization, Tausif Islam Chowdhury: Formal analysis, Writing – original draft, Writing – review & editing; Amir Rafe: Writing – review & editing. All authors reviewed and approved the final version of the manuscript.

**Funding**

No external funding was received to support this research.

**Ethical Approval**

This research did not involve human participants or animals and therefore did not require ethical approval.
